# Supplementary material for: Mechanical Regulation of Oral Epithelial Barrier Function
Source: MDPI journal article supplement (doi:10.3390/bioengineering10050517), 2023-04-25
Supplement: s1 [file s1]

## Supplementary Materials

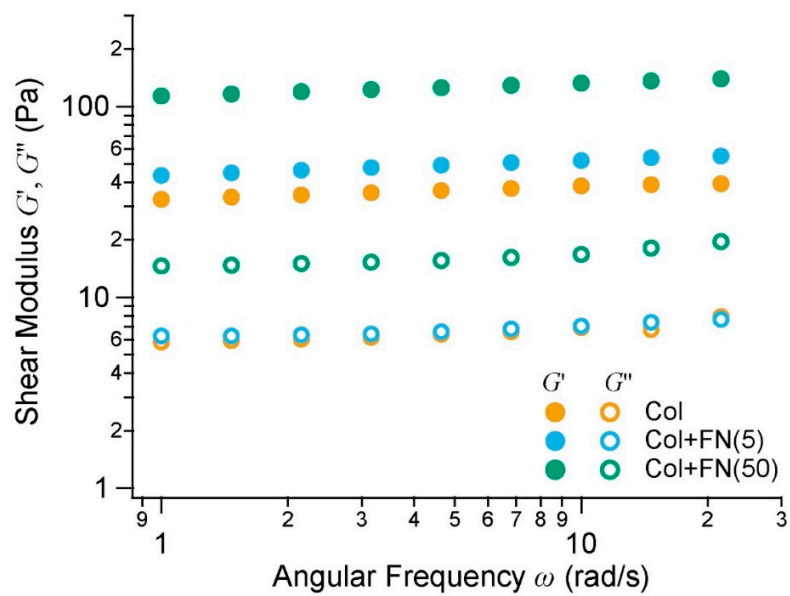

**Figure S1.** Graph of shear modulus for Col, Col+FN(5) and Col+FN(50) conditions at different frequencies.

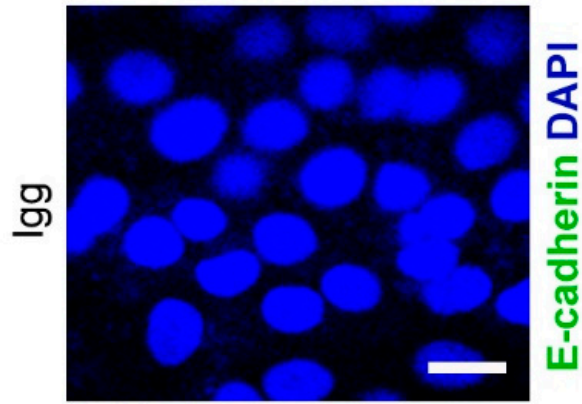

**Figure S2.** Negative control for staining IgG in HIGHs (Scale bar, 10  $\mu\text{m}$ ).

**Table S1.** PCR primers used in this study.

| Gene name      | Sequences                                                                                   |
|----------------|---------------------------------------------------------------------------------------------|
| human CDH1     | Forward 5'-GCC TCC TGA AAA GAG AGT GGA AG-3'<br>Reverse 5'-TGG CAG TGT CTC TCC AAA TCC G-3' |
| human ZO1      | Forward 5'-GTC CAG AAT CTC GGA AAA GTG CC-3'<br>Reverse 5'-CTT TCA GCG CAC CAT ACC AAC C-3' |
| human Occludin | Forward 5'-ATG GCA AAG TGA ATG ACA AGC GG-3'<br>Reverse 5'-CTG TAA CGA GGC TGC CTG AAG T-3' |
| human ITGB1    | Forward 5'-GGA TTC TCC AGA AGG TGG TTT CG-3'<br>Reverse 5'-TGC CAC CAA GTT TCC CAT CTC C-3' |
| human ITGA6    | Forward 5'-CGA AAC CAA GGT TCT GAG CCC A-3'<br>Reverse 5'-CTT GGA TCT CCA CTG AGG CAG T-3'  |
| human Lamin 5  | Forward 5'-GTC ACA GAG CAG GAG GTG GCT-3'<br>Reverse 5'-GCT TCT GTC AAG ACT CTC CAG G-3'    |
| human 18S      | Forward 5'-CGG CTA CCA CAT CCA AGG AA-3'<br>Reverse 5'-GCT GGA ATT ACC GCG GCT-3'           |

Abbreviation: CDH1, epithelial cadherin (E-cadherin); ZO1, Zonula occludens-1 (Tight junction protein-1); ITGB1, Integrin beta-1; ITGA6, Integrin alpha-6, 18S, 18S ribosomal RNA

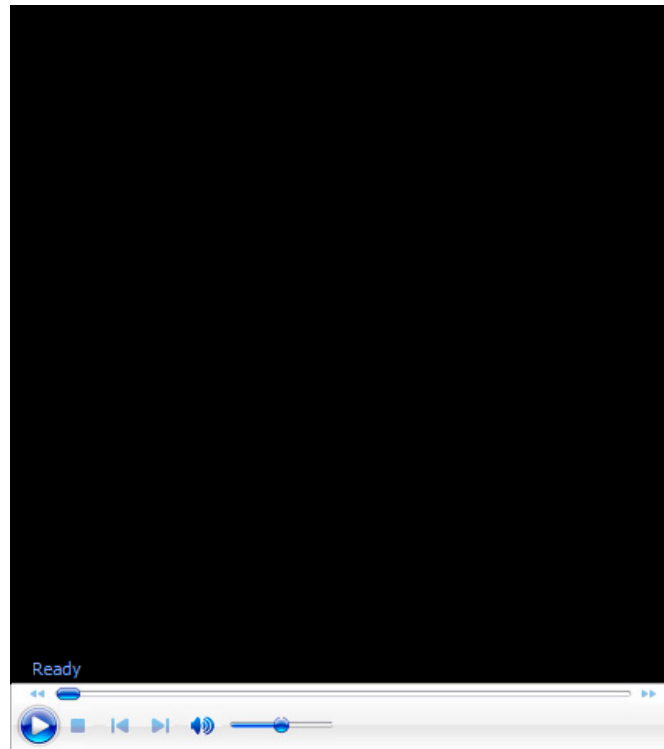

**Video S1.** Representative video for 70 kDa dextran permeability assay for 3 mg/mL collagen gel in the presence of mechanical stress (0.1 kPa).
